# 1 A practical staging atlas to study embryonic development of 2 *Octopus vulgaris* under controlled laboratory conditions

3 Deryckere Astrid<sup>1</sup>, Styfhals Ruth<sup>1,2</sup>, Vidal Erica A.G.<sup>3</sup>, Almansa Eduardo<sup>4</sup> and Seuntjens Eve<sup>1\*</sup>

4 <sup>1</sup> Laboratory of Developmental Neurobiology, Department of Biology, KU Leuven, Belgium; <sup>2</sup>

5 Department of Biology and Evolution of Marine Organisms, Stazione Zoologica Anton Dohrn, Naples,

6 Italy; <sup>3</sup> Center for Marine Studies, University of Parana, Brazil; <sup>4</sup> Instituto Español de Oceanografía

7 (IEO), Tenerife, Spain

8 \* corresponding author

## 9 Abstract

### 10 Background

11 *Octopus vulgaris* has been an iconic cephalopod species for neurobiology research as well as for  
12 cephalopod aquaculture. It is one of the most intelligent and well-studied invertebrates, possessing  
13 both long- and short-term memory and the striking ability to perform complex cognitive tasks.  
14 Nevertheless, how the common octopus developed these uncommon features remains enigmatic. *O.*  
15 *vulgaris* females spawn thousands of small eggs and remain with their clutch during their entire  
16 development, cleaning, venting and protecting the eggs. In fact, eggs incubated without females  
17 usually do not develop normally, mainly due to biological contamination (fungi, bacteria, etc.). This  
18 high level of parental care might have hampered laboratory research on the embryonic development  
19 of this intriguing cephalopod.

### 20 Results

21 Here, we present a completely parameter-controlled artificial seawater standalone egg incubation  
22 system that replaces maternal care and allows successful embryonic development of a small-egged  
23 octopus species until hatching in a laboratory environment. We also provide a practical and detailed

24 staging atlas based on bright-field and light sheet fluorescence microscopy imaging for precise  
25 monitoring of embryonic development. The atlas has a comparative section to benchmark stages to  
26 the different scales published by Naef (1928), Arnold (1965) and Boletzky (2016). Finally, we provide  
27 methods to monitor health and wellbeing of embryos during organogenesis.

## 28 **Conclusion**

29 Besides introducing the study of *O. vulgaris* embryonic development to a wider community, this  
30 work can be a high-quality reference for comparative evolutionary developmental biology.

## 31 **Keywords**

32 Cephalopod, Octopus, Embryo, Development, Atlas, Standalone, Light Sheet Fluorescence  
33 Microscopy

## 34 **Background**

35 *Octopus vulgaris* is a marine carnivorous cephalopod mollusk that inhabits a variety of coastal areas  
36 in a wide distributional range (1). Almost a century ago, Naef published the first classification of the  
37 embryonic development of *Loligo vulgaris*, *Sepia officinalis*, *O. vulgaris*, and *Argonauta argo*,  
38 demonstrating their potential of becoming model systems in developmental biology (2).

39 Cephalopod eggs can be roughly divided in small, medium or large in size and show a great  
40 diversification of encapsulation mechanisms (3). While the common cuttlefish lays individual  
41 medium-sized encapsulated eggs covered by an ink stained multilayer gelatinous envelope, the  
42 common octopus produces small eggs with a single transparent chorionic coat, devoid of a  
43 protective gelatinous capsule, which significantly increases their ease of use in laboratory  
44 experimental studies. The chorion itself is drawn out into a stalk and in octopods, many stalks are  
45 interwoven and glued together with material secreted by the female oviducal glands to form a string  
46 or festoon (Fig. 1A) (4,5). Octopuses that lay eggs that hatch out as planktonic paralarvae generally  
47 produce thousands of small eggs, reaching 500,000 in *O. vulgaris* (6). Fertilization is achieved during

48 spawning whereafter the string is attached to a substrate in the den (3,6). During embryonic  
49 development, cephalopod eggs generally increase in volume, although this phenomenon is more  
50 pronounced in decabrachian eggs compared to octopod eggs (7). In *O. vulgaris* eggs, this swelling  
51 process affects egg width and wet weight whereas length is nearly unaffected (8).

52 The embryonic development of cephalopods can roughly be separated in three periods. The first one  
53 includes maturation and fertilization of the oocyte, discoidal meroblastic cleavage to form the  
54 blastodisc and division to complete the blastoderm, the latter annotated as Stage I by Naef. The  
55 gastrulation or second period comprises the formation of the germinal layers with establishment of  
56 endoderm and extra-embryonic yolk epithelium (Stage II-IV) and the start of epiboly followed by  
57 concentrations of mesoderm (Stage V-VII). The organogenesis or third period begins with an  
58 elevation of blastodisc folds that prelude the appearance of the first organ primordia (Stage VIII-XI)  
59 that will give rise to the typical dibranchiate topology (Stage XII-XVII) and then, linear growth will  
60 eventually form a fully developed hatchling (Stage XVIII-XX) (2). The last stages of development  
61 (maturation) are more difficult to compare between cephalopods, since species that produce large  
62 eggs generally hatch out as juveniles that are miniature adults, while small egg-embryos hatch out as  
63 small planktonic paralarvae. The latter still have to go through major morphological changes to  
64 attain the juvenile form, such as the development of the arm-crown complex, swimming control, the  
65 chromatophore system and horizontal pupillary response (9–11). Furthermore, taxon specific  
66 features that arise in cuttlefish (e.g. cuttlebone) or squid (e.g. tentacles) embryos are absent from  
67 octopus and thus not discussed here.

68 Octopuses (e.g. *Octopus*, *Eledone* and *Tremoctopus*) undergo double reversion during embryonic  
69 development (12,13). The first reversion or blastokinesis takes place at Stage VII in *O. vulgaris*, when  
70 the extra-embryonic yolk epithelium just completed closure at the vegetative pole and is realized by  
71 a change of direction of the ciliary beat of the yolk envelope (12). In this process, the embryo  
72 migrates from the micropyle to the stalk side of the egg, which takes 7 to 36 hrs depending on water

73 temperature (12,14). While positioning at the stalk side might protect embryos better from  
74 predators and would reduce mechanical stress during organogenesis (Nande, personal  
75 communication), failure of turning does not impact embryonic development. The second reversion  
76 at Stage XIX then positions the embryo for smooth hatching (12). The physiological and  
77 morphological factors that trigger hatching in cephalopods are still unknown (5,15), but hatching  
78 starts with stretching mantle movements that rupture the apex of cells in the hatching gland or  
79 organ of Hoyle at the dorsal tip on the mantle (16,17). These glandular cells store proteolytic  
80 enzymes that dissolve the chorion locally, making the egg integument permeable to water, which  
81 increases the osmotic pressure within the perivitelline space (5,18–20). Afterwards, the mantle is  
82 extruded due to a release of pressure and the Kölliker organs (hard bristle-like structures spread  
83 over the skin) make sure that the embryo does not slip back into the chorion so it can move freely  
84 from the egg during hatching (9,20,21).

85 Due to breeding season limitations as well as geographical spread, different cephalopod species are  
86 being researched around the world. In addition, the release of several cephalopod genomes as well  
87 as transcriptomic information over the last years now allows molecular and functional studies on  
88 these enigmatic creatures (22–26). In combination with novel genome editing technologies, this  
89 opens interesting opportunities to interrogate *in vivo* gene function. However, in *O. vulgaris*,  
90 progress in these fields has been hampered by the absence of protocols to maintain egg clutches  
91 without maternal care in standardized laboratory conditions. Furthermore, to fully evaluate the  
92 impact of genetic change on development, an updated description of embryonic development using  
93 modern imaging technologies is valuable. Additionally, there is a need for a standardized, fully-  
94 illustrated staging system allowing easy comparison of embryonic development between different  
95 cephalopod model species. We acknowledge the inevitable generalization introduced by comparing  
96 embryonic stages and refer to species-specific morphological descriptions of *S. officinalis*, *Euprymna*  
97 *scolopes*, *Todarodes pacificus*, *Loligo pealei*, *L. gahi* and *O. vulgaris* (2,27–31). Although cephalopod

98 egg and thus hatchling size and consequently the embryonic development duration greatly vary,  
99 morphogenetic processes are similar.

100 Naefs staging atlas of *O. vulgaris* is still frequently used today, although being based on the age of  
101 embryos in days (which changes according to incubation temperature (8)), rather than stage-specific  
102 morphological characteristics. Therefore, Arnold and Lemaire (later adapted by Boletzky) introduced  
103 ten extra stages, focusing on the development of *L. pealei* (officially renamed *Doryteuthis pealeii*)  
104 and *S. officinalis*, respectively (27,28,32). These extra stages mostly cover the period of embryo  
105 cleavage (e.g. Arnold and Boletzky Stage 9 correspond to Naef Stage I), which can also be described  
106 by the number of blastomeres as proposed by Naef. Both staging scales do not readily cover the  
107 considerable gaps in development between different stages and important developmental events  
108 are still largely neglected. Moreover, the arbitrary use of 20 or 30 stage atlases by different research  
109 groups make evolutionary comparison between cephalopods challenging. Therefore, we introduce  
110 here a comprehensive atlas, based on the staging presented by Naef, but including a differentiation  
111 in early and late phases of some stages in an attempt to highlight important details and to cover  
112 larger developmental gaps. We focus on the development of *O. vulgaris* as a model for small-egged  
113 cephalopod species. Furthermore, for easy translation between cephalopod species, we propose a  
114 comparative table of staging scales most often used by cephalopod researchers, ie. Arnold stages for  
115 *D. pealei*, Boletzky stages for *S. officinalis* and Naef stages for *O. vulgaris* (2,27,28). Hence, this atlas  
116 not only represents a timely standardized staging system to allow easy comparison between  
117 different model species, but also provides accompanying images to easily illustrate important  
118 developmental features. Detailed bright-field and light sheet fluorescence microscopy (LSFM) images  
119 of all developmental stages were added to be used in the laboratory as a staging atlas.

120 Finally, this work describes a standardized standalone tank system that should facilitate any  
121 laboratory on small-egged cephalopods, regardless of access to fresh seawater. We also supply  
122 validation assays for checking the health of embryos at different stages.

## 123 Results

124 The small, yolky eggs of *O. vulgaris* are roughly 2.5 mm long and 1 mm wide. *Octopus* embryos are  
125 described to develop poorly without maternal care (2,33). However, we have found that *O. vulgaris*  
126 embryos can develop without maternal care in artificial oxygenated seawater at continuous strong  
127 flow rate and dim light. The standalone system ensured a continuous flow in the tanks resulting in an  
128 oblique orientation and soft swirling of the strings, likely mimicking the jet flow the mother normally  
129 provides (Fig. 2). The embryos developed highly synchronous within the string and hatched after  
130 approximately one month at 19 °C. We provide a summary table with key characteristics of each  
131 stage to allow consistent staging of *O. vulgaris* embryos (Table 1) as well as a comparative table  
132 including Arnold and Boletzky stages for easy translation between cephalopods (Table 2). As the  
133 developmental stages presented by Naef are based on days of development rather than on  
134 morphological characteristics and contain considerable gaps in development, we split some events  
135 and added '.1' or '.2' in such cases. For all descriptions presented, the morphological axes of the  
136 embryo are used (Fig. 1B). According to these axes, the location of the funnel is posterior, the  
137 embryonic mouth anterior, the arm crown ventral and the mantle dorsal.

## 138 Cleavage, Gastrulation and Epiboly

139 The germinal disc is restricted to the animal pole of the egg, at the micropyle side, which is opposite  
140 from the stalk. Meroblastic, bilaterally symmetrical cleavage and subsequent formation of the  
141 blastodisc (Stage I) takes place over the first 24-48 hrs after fertilization, depending on water  
142 temperature. The first three cleavages are incomplete and generate eight equally sized blastomeres  
143 in octopods (Fig. 3A-D), which differs from decapods where the two dorso-medial cells are more  
144 narrow compared to the ventro-medial cells (2). Further cell proliferation results in the formation of  
145 the blastodisc at Stage I (Fig. 3E). At Stage II, formation of the blastula is completed (Fig. 3F),  
146 followed by the onset of epiboly at Stage III, characterized by lateral expansion of the blastoderm  
147 over the yolk by cell division (Fig. 3G). The blastodisc, which can be found at the very top of the yolk  
148 at Stage II starts to grow and expand over the yolk, generating a cap-like structure by Stage IV (Fig.

149 3H). At Stage V, a quarter of the yolk is covered by the embryonic cap (Fig. 3I). Using bright-field  
150 imaging, the embryo looks uniform at this stage. However, using light sheet microscopy and DAPI as  
151 a nuclear stain, the embryo proper with its densely packed nuclei can be clearly distinguished from  
152 the extraembryonic ectoderm with larger nuclei spaced further apart (Fig. 3I-I'). At Stage VI, the  
153 germinal disc covers half of the yolk mass (Fig. 3J-J'). From this stage onwards, the embryo slowly  
154 rotates clockwise when observed from the micropyle side of the egg, along its longitudinal axis  
155 (Additional file 1 shows a movie of embryo rotation accelerated to 8x original speed at Stage XI  
156 (12,14). By the end of Stage VII.1, the embryo and yolk envelope (extraembryonic) cover 3/4<sup>th</sup> of the  
157 yolk, followed by complete closure at the vegetative pole, ready for the first reversion (Fig. 3K).

## 158 Organogenesis and Maturation

159 At Stage VII.1, the surface of the embryo appears smooth. The first organ primordia can be visualized  
160 using DAPI, revealing the prospective arms as patches of dense nuclei close to the yolk envelope (Fig.  
161 3K-K'). The embryo makes its first reversion at the end of Stage VII. This process takes 7 to 36 hrs,  
162 depending on the incubation temperature (14), in which the embryo migrates over the yolk from the  
163 micropyle to the stalk side of the egg and can be observed in different topologies (Fig. 3M-O). At  
164 Stage VII.2, primordia become visible by bright-field microscopy as thickenings and depressions that  
165 arise from the surface of the embryo (Fig. 3L). The eye placodes, mantle anlage, arm primordia and  
166 mouth are the first distinguishable structures (Fig. 3L') and become more discernable towards Stage  
167 VIII (Fig. 4), when the mantle rim is elevated.

168 During the next stages of organogenesis, the organ primordia become more prominent and are  
169 clearly distinguishable from the yolk, giving rise to an immature embryo at Stage XVII (Fig. 4-7;  
170 Additional files 2-13 show movies of embryos imaged with LSFM). At Stage IX, the arm buds are  
171 clearly separated from one another, the mantle appears more elevated and first yellow  
172 pigmentation of the retina is visible. The yolk sac envelope that contains blood lacuna and a network  
173 of muscular elements starts to create peristaltic waves of surface contraction at this stage,

174 establishing blood circulation for the early embryo (Additional file 14 shows yolk contraction at Stage  
175 XI) (34). This phenomenon will cease around Stage XVI, when the embryonic heartbeat is well  
176 established and when the area of contact between the yolk envelope and the chorion becomes too  
177 small (12).

178 In order to distinguish embryos between Stages IX and XIII, mantle size and the angle relative to the  
179 imaginary plane through the eyes, as well as folding of the funnel tube are easily recognizable  
180 morphological characteristics (LSFM images in Fig. 4, 5, funnel in Fig. 6). The shape of the funnel is  
181 visible through the chorion, but is easier to observe after dechorionation. At Stage IX, the funnel  
182 tube rudiments become visible (Fig. 6A) and fuse at the margins by stage X (white arrow Fig. 6B). At  
183 Stage XI, the funnel tube rudiments have grown in size and bend towards the midline (Fig. 6C). Then,  
184 at the beginning of Stage XII (Stage XII.1), the funnel starts to form a real tube that is fused at the  
185 ventral extremity by Stage XII.2 (Fig. 6D-E). But, it is at Stage XIII that the formation of the siphon  
186 shaped funnel tube is complete (Fig. 6F). In the subsequent events, the position of the mouth on the  
187 anterior side changes (Fig. 7, white arrows on LSFM images). The mouth is situated between the first  
188 pair of arms on the anterior side from Stage VIII to XIV and is still open to the outside at Stage XV.1.  
189 It will start to internalize, becoming encircled by the anterior arms at Stage XV.2. By Stage XVI, the  
190 mouth is covered by the arm crown, waiting to take its final position as soon as the outer yolk is  
191 reduced.

192 As the embryos grow, the shape of the mantle goes from depressed towards the middle at Stage  
193 VII.2 to flat and perpendicular to the longitudinal axis at Stage X. At Stage XI, the mantle is elevated  
194 on the posterior side and thus tilted and clearly grows in size by Stage XII. At Stages XIII and XIV, the  
195 length of the mantle equals and exceeds the length of the head in the dorsoventral axis, respectively  
196 (Fig. 5, 7), and at Stage XIV, a heartbeat can be observed at the mantle tip (Additional file 15 shows  
197 embryonic heart beat at Stage XVII). From Stage IX to stage XIV, the color of the retina changes from  
198 light yellow to dark red/brown. The color of the eye and retina continues to darken during



199 development, until the eye is completely black and covered by an iridescent layer, clearly visible  
200 from Stage XIX onwards.

201 The chromatophore pattern (appearance, color and size of chromatophores) is another convenient  
202 characteristic to stage *O. vulgaris* embryos (Fig. 7, 8, 9). At Stages XV.1 and XV.2, the first  
203 chromatophores appear as small yellow dots on the posterior side, next to the funnel and on the  
204 mantle, respectively. By Stage XVI, the first chromatophores on the anterior mantle appear. From  
205 Stage XVIII.2 onwards, the chromatophores react to changes in light intensity under the microscope  
206 (expand under light stimulation and contract in the dark). The ratio of the size of the external yolk  
207 sack in relation to the size of the embryo is another measure that can be used for staging (Fig. 7, 8,  
208 9). At Stage XIV, this ratio approximates 1:1 and rapidly decreases to 1:3 at Stage XVI, 1:4 at Stage  
209 XVIII.1 to 1:6 at Stage XIX.1. This latter stage is also characterized by the first appearance of ink in  
210 the ink sac on the posterior side. The embryo undergoes the second reversion at Stage XIX. We  
211 annotate these stages as XIX.1 before and XIX.2 after the second reversion.

212 At Stages XX.1 and XX.2, the external yolk sack is nearly and completely depleted, respectively  
213 (Additional file 16 shows a movie of a Stage XX.2 embryo imaged with LSM). It has been described  
214 that cephalopod embryos are likely slightly sedated in the egg by a tranquillizing factor to prevent  
215 premature hatching which can occur at these stages (35). What precisely induces natural hatching is  
216 still unknown, but it is easily triggered by several factors, such as mechanical stimuli,  
217 photoperiodicity and sudden changes in light levels or temperature (15). We observed that natural  
218 hatching starts approximately seven days after the second reversion at 19 °C, but is detrimental to  
219 the paralarvae in the tank system under continuous flow. Therefore, seven days post second  
220 reversion, we moved the strings from the system to a different tank containing aerated artificial  
221 seawater, which induced hatching within minutes.

222 *Insert Table 1 here*

## 223 Assays to evaluate embryonic fitness

224 Yolk contraction can be observed from Stage IX to Stage XVI under the stereomicroscope and is a  
225 valuable readout to evaluate embryonic survival at early organogenesis stages. Furthermore, upon  
226 development of the retina, a "saddle" to discoidal shape of the pigmented layer is typical of high-  
227 quality embryos. Frowning or folding of the retina points towards poor health. From Stage XIV  
228 onwards, a heartbeat can be recognized in the transparent embryos. Occasionally, small crustaceans  
229 can be observed on the strings. Generally, these are part of the natural ecosystem of the string and  
230 are not impacting embryonic development. Nevertheless, poor rearing conditions (insufficient flow,  
231 dissolved oxygen levels and strings floating or sunken) can trigger strings to overgrow with fungi  
232 (white thread-like structures or parts turning pale or pink) or get infected by worms. A final readout  
233 of state of the art rearing is the hatching of actively swimming paralarvae that display positive  
234 phototaxis, reported for most cephalopod hatchlings (9,36,37).

235 *Insert Table 2 here*

## 236 Discussion

237 We introduced a low-cost standalone system that runs on artificial seawater for incubating small-  
238 eggged *Octopus* species without maternal care. The feasibility and effectiveness of our system was  
239 reflected in a highly synchronous development of embryos within the string and in the production of  
240 viable hatchlings.

## 241 Replacing maternal care

242 Incirrate octopods and some oceanic squids display parental care during embryonic development  
243 (15,38). As in many octopods, *O. vulgaris* females take care of the eggs during the whole embryonic  
244 development, venting, cleaning and protecting them from predators. Female care ensures high  
245 hatching rates and the production of viable hatchlings as incubating eggs without the female often  
246 resulted in the proliferation of pathogens (fungi and bacteria) on the eggs (EAG Vidal, personal

247 observation)(39). Incubation without maternal care for small-egged *Octopus* species has therefore  
248 not always been possible. On the other hand, the large eggs (up to 17 mm length) of *Octopus maya*  
249 can be artificially incubated without the female with nearly 100% success rate for fertilized eggs (40).  
250 In 1977, Van Heukelem used a glass funnel with filtered seawater to incubate the eggs of *O. maya*.  
251 After adjusting seawater flow, the eggs were maintained slowly tumbling and rubbing against one  
252 another in order to keep the egg surface clean and aerated. This author also described that air  
253 bubbles interfered with the development of the yolk epithelium and were thus harmful to the  
254 embryos (41). Similarly, our early attempts to incubate egg strings in beakers or tanks with fine air  
255 bubbles venting in from the bottom were equally unsuccessful, and yielded embryos that did not  
256 manage to partition the inner from the outer yolk sack, leading to incomplete yolk epithelium  
257 development and thus, embryo malformation and death. Accordingly, egg strings should not be  
258 exposed to air bubbles and aeration of the water is therefore best performed outside of the tanks  
259 that house the strings. A second major improvement to our tank system was the combination of a  
260 relatively strong water flow and attachment of strings to the lateral side of the tank where the main  
261 current is, several centimeters below the water surface, ensuring that the strings were swirling  
262 around gently in the water. These adaptations yield a similar condition in which eggs are  
263 continuously rubbing against each other, likely functioning as a natural cleaning system. Third, we  
264 maintained the eggs in very dim light conditions (0-5 lux) using a 14L:10D photoperiod, which likely  
265 mimics the natural dark environment of egg clutches in the den. To what extent egg maintenance in  
266 dim light is absolutely required remains to be studied, but a preliminary study in *L. vulgaris* showed  
267 an inverse relationship between light intensity and hatching success (42).

## 268 Hallmarks of good quality embryos

269 Using these conditions, we noted a highly synchronous development within each string, with very  
270 little embryonic death or malformation occurring. Whereas embryonic development progress is  
271 more difficult to assess before Stage VII.2, after the first reversion, a number of hallmarks can be  
272 used to assess vitality of the embryos, such as yolk contractions, and later on heart beating, although

273 these might be irregular at early embryonic stages. Inability to gradually reduce the inner yolk during  
274 organogenesis, frowning of the retina and increased presence of particles on the chorion are signs of  
275 poor embryo condition, and resulted in embryonic death. Poor embryo condition also seemed to  
276 trigger an increased infestation risk of bacteria, fungi or parasites (worms). Recently, Maldonado *et*  
277 *al.* successfully used a bleaching protocol on *Octopus insularis* eggs to clean them from  
278 microorganism contamination prior to individual egg housing in restricted water circulation (43).  
279 Restricted housing without bleaching caused 100 % mortality within a few days whereas 67.6 % of  
280 the bleached embryos survived. Although individual egg housing can be beneficial for certain  
281 experiments, it is extremely labor intensive and requires much more space to house the same  
282 amount of eggs compared to the system described here.

### 283 **Developing clear staging criteria**

284 Several hallmarks can be used to easily identify developmental stages in *O. vulgaris*. In the early  
285 embryo, the rate of epiboly demarcates each stage. Afterwards, from Stage IX to Stage XIV, the  
286 formation of the funnel, as well as mantle shape and size can be used to differentiate the embryos.  
287 From Stage XV onwards, the amount, color intensity and reactivity of the chromatophores increases  
288 with embryo development and the size of the outer yolk sack is progressively reduced until it is  
289 completely absorbed at hatching (Table 1). When rearing conditions are not ideal, premature  
290 hatching occurs and paralarvae hatch out with the outer yolk sack still present, resulting in high  
291 mortality rates (44).

292 When using these morphological characteristics to stage *O. vulgaris* embryos, we encountered the  
293 necessity to introduce extra developmental stages besides those proposed by Naef (2). In addition,  
294 these extra stages with defined hallmarks make the comparison with other cephalopods easier. For  
295 example, Stage VII annotated by Naef as the stage where differentiation of the mesoderm  
296 contractions starts, corresponds to Arnold Stages 17 and 18 in *L. pealei* (*D. pealeii*). By dividing this  
297 Stage VII in two, Stage VII.1 now corresponds to Stage 17, where placode thickening starts and Stage

298 VII.2 corresponds to Stage 18, where organ primordia of the mantle, eyes, mouth and arms are  
299 clearly visible (see also Table 2) (27).

300 In cephalopod research, two different representations of body axes are used at random (i.e.  
301 morphological and functional body axes). When adopting the morphological body axes of a  
302 cephalopod, the embryonic mouth is anterior and the funnel posterior, the mantle dorsal and the  
303 arms ventral. In this setup, the mouth-funnel axis corresponds to the molluscan anterior-posterior  
304 axis where the foot is ventral. On the other hand, when using the functional body axes that  
305 correspond to the adult convention, the embryonic mouth is dorsal and the funnel ventral, the  
306 mantle posterior and the arms anterior. For the sake of comparison, the body axes should be clearly  
307 defined in each publication.

## 308 Conclusions

309 The data presented here aimed at facilitating developmental research on cephalopods, and in  
310 particular octopus species, under standardized laboratory conditions. We therefore removed  
311 potential roadblocks, such as obligatory maternal care and the availability of natural seawater, which  
312 we solved by introducing a low-cost standalone tank system that runs on artificial seawater. Given  
313 the high fecundity of *O. vulgaris* females, the high number of eggs from each string and the  
314 robustness of the embryos, egg strings from different females can be shipped and shared between  
315 laboratories in order to serve the growing community. In the present study, using classical and  
316 contemporary imaging technologies, we generated a comprehensive overview of *O. vulgaris*  
317 embryonic development along with a practical illustrated atlas. We documented the different stages  
318 of embryonic development and compared them to published literature, allowing practical use and  
319 unambiguous staging, which represents a reliable resource for comparative developmental biology  
320 in the cephalopod field.

## 321 Methods

### 322 Standalone system for egg incubation and embryo maintenance

323 Live egg strings of *O. vulgaris* were obtained from breeding females from the Instituto Español de  
324 Oceanografía (IEO), Tenerife, Spain, as soon as possible after spawning. The egg strings were  
325 attached to a nylon thread and transported in seawater in closed 50 mL falcons at ambient  
326 temperature to the Laboratory of Developmental Neurobiology in Leuven, Belgium. Transport time  
327 from tank to tank amounted to a maximum of 12 hrs. Upon arrival in the lab, single strings were  
328 placed in a standalone system that consisted of 10 conocylindrical opaque PVC tanks (16 cm  
329 diameter, 25 cm height), with a water inlet placed at the top to create a circular current with a water  
330 exchange rate of 3 L min<sup>-1</sup> (Fig. 2A). The standalone system continuously circulated aerated artificial  
331 seawater (Instant Ocean 40 g L<sup>-1</sup>, supplemented with 8 mg L<sup>-1</sup> Strontium), which was continuously  
332 cooled to 19 °C, sterilized by UV (Deltec Profi UV sterilizer 39 W type 391), filtered through a mesh (1  
333 mm) in each tank and circulated through a shared biological filter (21 x 21 x 11 cm, MarinePure  
334 Block, CER MEDIA) (Fig. 2B). The total volume of the system was 100 L, conductivity 50-55 mS, light  
335 intensity between 0-5 lux (dusk-dark) with a photoperiod of 14L:10D and pH was maintained  
336 between 8.1-8.3.

337 Each *O. vulgaris* egg string was attached to a glass rod using the nylon threads and placed on the  
338 lateral side of a tank, where it was in constant motion generated by the gentle current from the  
339 water inflow (Fig. 2A). The top of the tanks was covered with plastic foil to avoid evaporation and  
340 Aluminum foil to block light. After observation of the second reversion, embryos were left  
341 undisturbed for seven days to avoid premature hatching (44).

### 342 Bright-field imaging

343 Egg strings were obtained from four different females. Embryos were observed daily and a sample of  
344 20 representative embryos was removed daily from the string for imaging. All observations were  
345 based upon embryos reared in the standalone system. At least 4 strings for each female were

346 monitored. Since fertilization was not timed and spawning takes place over several days, different  
347 strings of a single female were in different developmental stages, allowing monitoring of subtle  
348 changes and transitions during embryonic development. Embryos reared in this system were  
349 compared to fixed reference embryos obtained from sibling strings at the laboratory of E. Almansa  
350 (IEO) and also to independent reference embryos from the laboratory of E. Vidal (Center for Marine  
351 Studies, University of Parana, Brazil). Images were taken with a Zeiss Stereo Discovery.V8 equipped  
352 with an AxioCam ICc 3 camera (Carl Zeiss AG, Germany) and represent static stages based on a  
353 morphological consensus from different embryos.

### 354 [Optimized CUBIC clearing protocol](#)

355 The advanced CUBIC (Clear, Unobstructed Brain/Body Imaging Cocktails and Computational Analysis)  
356 protocol was adapted from Susaki et al. (45). In short, eggs were fixed overnight in 4%  
357 paraformaldehyde (PFA) in phosphate-buffered saline (PBS) – or from Stage XX.1 onwards first  
358 submersed in 2% EtOH in seawater (to avoid stress and premature hatching) and then fixed in 2%  
359 EtOH, 4% PFA in seawater - and washed in PBS. To anticipate retrieval and convenient manipulation  
360 of the cleared embryos, Chinese ink was injected in the yolk before manual dechoriation using  
361 forceps. Embryos were incubated in 1/2-distilled-water-diluted *Scale*CUBIC-1 in an orbital shaker of  
362 a hybridization oven at 37 °C for 3-6 hrs and then immersed in *Scale*CUBIC-1 (25 wt% urea, 25 wt%  
363 Quadrol, 15 wt% Triton X-100). After overnight incubation, *Scale*CUBIC-1 was replaced and embryos  
364 were further incubated for three days with one additional *Scale*CUBIC-1 replacement. At this point,  
365 the yolk was completely transparent, chromatophores were cleared and the eye pigment of Stage XX  
366 embryos was reduced from black to reddish (comparable to live Stage XIII embryos). Embryos were  
367 then washed with PBS three times (1x 2 h, 1x overnight and 1x 2h) in the hybridization oven.  
368 Afterwards, they were incubated in 1/2-water-diluted *Scale*CUBIC-2 for 3-6 hrs (until the samples  
369 sunk to the bottom) and then incubated in *Scale*CUBIC-2 (25 wt% urea, 50 wt% sucrose, 10 wt%  
370 triethanolamine) for one day in the hybridization oven. For nuclear staining, DAPI (final

371 concentration 1  $\mu\text{g mL}^{-1}$ ) was added to *ScaleCUBIC-1* in the three days incubation in *ScaleCUBIC-1*  
372 step and during washes in PBS.

### 373 [Light sheet fluorescence microscopy \(LSFM\)](#)

374 Stained embryos were glued with their yolk sack on a metal rod and imaged using a Zeiss Z1 light  
375 sheet microscope (Carl Zeiss AG, Germany) in low-viscosity immersion oil mix (Mineral oil, Sigma  
376 M8410 and Silicon oil, Sigma 378488, 1:1). Then, 3D reconstructions were generated in Arivis  
377 (Vision4D, Zeiss Edition 2.10.5).

## 378 [Declarations](#)

### 379 [Ethics approval and consent to participate](#)

380 Not applicable

### 381 [Consent for publication](#)

382 Not applicable

### 383 [Availability of data and materials](#)

384 All data generated or analyzed during this study are included in this published article [and its  
385 supplementary information files].

### 386 [Competing interests](#)

387 The authors declare that they have no competing interests

## 388 [Funding](#)

389 A. Deryckere was supported by an SB Ph.D. fellowship of Fonds Wetenschappelijk Onderzoek (FWO)  
390 Belgium (Project No. 1S19517N) and R. Styfhals was supported by a fellowship from Stazione  
391 Zoologica Anton Dohrn and KU Leuven. E. Almansa was supported by the Spanish government  
392 (OCTOMICs project, AGL2017-89475-C2-2-R) and EAG. Vidal was supported by the Brazilian National  
393 Research Council- CNPq (Pro. 312331/2018-1 and 426797/2018-3). E. Seuntjens was supported by



394 funding of the FWO (G0B5916N and G0C2618N) and the KU Leuven (C14/16/049). Publication cost  
395 was covered by the KU Leuven Fund for Fair Open Access.

### 396 **Authors' contributions**

397 EA provided live octopus eggs and EV provided fixed reference samples. AD and RS sampled octopus  
398 embryos. AD carried out the experiments. ES supervised the findings of this work. AD prepared the  
399 figures and wrote the manuscript with critical input from all authors. All authors read and approved  
400 the final manuscript.

### 401 **Acknowledgements**

402 We wish to thank Beatriz C. Felipe and M<sup>a</sup> Jesús Lago for their technical support in the broodstock  
403 management and Oliver Van Moerbeke and Arnold Van Den Eynde for designing and constructing  
404 the standalone system.

### 405 **Figure legends**

#### 406 **Figure 1. *Octopus vulgaris* eggs and the embryonic morphological body axes**

407 A. A string of *O. vulgaris* eggs. Scale bar represents 500  $\mu\text{m}$ .

408 B. The morphological axes in cephalopod embryos correspond to the axes in other mollusks. In this  
409 orientation, the location of the funnel is posterior, the embryonic mouth is anterior, the arms are  
410 ventral and the mantle is dorsal.

#### 411 **Figure 2. Graphical representation of the standalone system used for egg** 412 **incubation**

413 A. The opaque conocylindrical PVC tank has a water inlet at the top (blue arrow), which creates a  
414 circular current and delivers seawater at an exchange rate of 3 L min<sup>-1</sup>. A mechanical filter (1 mm  
415 mesh size) is placed at the bottom of the tank in the water outflow. An *O. vulgaris* egg string is  
416 attached to a glass rod and placed on the lateral side of the tank, where it moves constantly by a

417 gentle current generated by the water inflow. The blue arrows indicate the water flow (from top to  
418 bottom) and the red horizontal bars indicate the water level.

419 B. The standalone system consists of 10 conocylindrical tanks placed on top of a reservoir. Artificial  
420 seawater is aerated by the strong water flow pouring into the biological filter in the reservoir and is  
421 sterilized by an external UV filter (details provided in Methods section). The total volume in the  
422 system is 100 L.

### 423 **Figure 3. Cleavage, gastrulation, epiboly and reversion in *O. vulgaris***

424 Bright-field images of embryos in cleavage (A-D), at Stage I (E), Stage II (F), Stage III (G), Stage IV (H),  
425 Stage V (I), Stage VI (J), Stage VII.1 (K) and Stage VII.2 (L). Nuclear staining of Stage V (I'), Stage VI (J'),  
426 Stage VII.1 (K') and Stage VII.2 (L') embryos imaged with LSFM. Black arrowheads indicate the  
427 progression of epiboly, red arrowheads the borders of the embryo proper. At Stage VII, *O. vulgaris*  
428 embryos undergo the first reversion (M) and can be observed in distinct phases/ topologies during  
429 reversion (N-O) with LSFM. Scale bars represent 200  $\mu\text{m}$ . *Abbreviations: a, arm; ey, eye; LSFM, light*  
430 *sheet fluorescence microscopy; ma, mantle; mo, mouth; st, statocyst; yc, yolk cells.*

### 431 **Figure 4. First part of organogenesis in *O. vulgaris***

432 Bright-field images of *O. vulgaris* embryos from Stage VIII to Stage X from the posterior, lateral and  
433 anterior side. Lateral LSFM images after DAPI staining show that the planes that run through the  
434 mantle and eyes run parallel (white dashed lines). Scale bars represent 200  $\mu\text{m}$ . *Abbreviations: A,*  
435 *anterior; a, arm; D, dorsal; ey, eye; fp, funnel pouch; fu, funnel; LSFM, light sheet fluorescence*  
436 *microscopy; ma, mantle; mo, mouth; P, posterior; st, statocyst; V, ventral.*

### 437 **Figure 5. Second part of organogenesis in *O. vulgaris***

438 Bright-field images of *O. vulgaris* embryos from Stage XI to Stage XIII from the posterior, lateral and  
439 anterior side. Lateral LSFM images after DAPI staining show how the mantle is now tilted (white  
440 dashed lines) and growing (white double arrows) during development. Scale bars represent 200  $\mu\text{m}$ .

441 *Abbreviations: A, anterior; a, arm; D, dorsal; ey, eye; fu, funnel; gi, gills; LSFM, light sheet*  
442 *fluorescence microscopy; ma, mantle; mo, mouth; P, posterior; st, statocyst; su, sucker; V, ventral.*

### 443 **Figure 6. Development of the funnel apparatus in *O. vulgaris***

444 LSFM image of the posterior side of the embryo focusing on the funnel apparatus, showing its  
445 gradual thickening and fusion to form a funnel tube by Stage XIII. The funnel rudiments visible at  
446 Stage IX (A) fuse at the ventral margins at Stage X (white arrow in B). The rudiments then bend  
447 towards the midline at Stage XI (C) until they are touching one another at Stage XII.1 (D). Fusion to  
448 form the tube starts at the ventral extremity at Stage XII.2 (E) and closure finishes at the dorsal side  
449 by Stage XIII (F). *Abbreviations: D, dorsal; ey, eye; fu, funnel; LSFM, light sheet fluorescence*  
450 *microscopy; V, ventral.*

### 451 **Figure 7. Third part of organogenesis in *O. vulgaris***

452 Bright-field images of *O. vulgaris* embryos from Stage XIV to Stage XVII from the posterior, lateral  
453 and anterior side. The appearance of chromatophores on the posterior and subsequently anterior  
454 side can be used to stage the embryos. Lateral LSFM images after DAPI staining show the  
455 internalization of the mouth (white arrows) with the mouth lying outside the arm crown at Stage XIV  
456 and inside by Stage XVI. Scale bars represent 200  $\mu\text{m}$ . *Abbreviations: A, anterior; a, arm; ey, eye; fu,*  
457 *funnel; gi, gills; LSFM, light sheet fluorescence microscopy; ma, mantle; mo, mouth; P, posterior; su,*  
458 *sucker.*

### 459 **Figure 8. Final stages of maturation in *O. vulgaris* (Part 1)**

460 Bright-field images of *O. vulgaris* embryos from Stage XVIII.1 to XIX.1 from the posterior, lateral and  
461 anterior side. The chromatophore pattern (number, size and color) and the size of the external yolk  
462 sack can be used to distinguish the different stages before hatching. Scale bars represent 200  $\mu\text{m}$ .

## 463 Figure 9. Final stages of maturation in *O. vulgaris* (Part 2)

464 Bright-field images of *O. vulgaris* embryos from Stage XIX.2 to XX.2 from the posterior, lateral and  
465 anterior side. The chromatophore pattern (number, size and color) and the size of the external yolk  
466 sack can be used to distinguish the different stages before hatching. After the second reversion  
467 between Stage XIX.1 and XIX.2, (premature) hatching can occur. Scale bars represent 200  $\mu\text{m}$ .

468

## 469 Tables

470 Table 1. Hallmarks of each developmental stage in *O. vulgaris*

| Stage       | Characteristic                                                                                                                                                       |
|-------------|----------------------------------------------------------------------------------------------------------------------------------------------------------------------|
| Stage 0     | Cleavage                                                                                                                                                             |
| Stage I     | Morula (advanced cleavage)                                                                                                                                           |
| Stage II    | Blastula; disk flatter                                                                                                                                               |
| Stage III   | Onset of epiboly                                                                                                                                                     |
| Stage IV    | Formation of the germinal disk, as wide as the yolk                                                                                                                  |
| Stage V     | Epiboly reaches 1/4th of the yolk                                                                                                                                    |
| Stage VI    | Epiboly reaches 1/2nd of the yolk                                                                                                                                    |
| Stage VII.1 | Epiboly reaches 3/4th of the yolk<br>Visible thickening of placodes starts                                                                                           |
| Stage VII.2 | Embryo completed first reversion<br>Primordia of eyes, mouth, mantle and arms clearly visible                                                                        |
| Stage VIII  | Mouth and eye invagination<br>Mantle elevated and embryo thicker<br>Funnel pouches visible in lateral view                                                           |
| Stage IX    | First eye pigmentation (yellowish)<br>Primordia more prominent<br>Funnel tube rudiments are distinct<br>Contraction of yolk envelope evident                         |
| Stage X     | Mantle flat, no depression in the middle<br>Eye vesicles sticking out with light orange retina ("saddle" shape)<br>Funnel tube rudiments fuse at the ventral margins |
| Stage XI    | Mantle tilted<br>Funnel tube rudiments bended towards midline<br>Arm buds 'elevated' from yolk                                                                       |
| Stage XII.1 | Mantle thicker and covers 1/2nd of gills<br>Funnel tube rudiments start to form a tube ventrally<br>First suckers recognizable on the posterior side                 |
| Stage XII.2 | Mantle bowl-shaped                                                                                                                                                   |

|               |                                                                                 |
|---------------|---------------------------------------------------------------------------------|
|               | Funnel formed siphon at ventral extremity                                       |
| Stage XIII    | Mantle is bigger                                                                |
|               | Formation of the funnel complete                                                |
|               | Arms elongated and pointed with (3) prominent suckers                           |
| Stage XIV     | Mantle as wide as long and cube-shaped, covers gills completely                 |
|               | Heartbeat starts                                                                |
|               | Embryo and yolk have equal size                                                 |
| Stage XV.1    | Mantle completely covers ventral margin of funnel                               |
|               | Inner yolk strongly constricted (connection inner and outer yolk sac very thin) |
|               | Appearance of two chromatophores laterally from the funnel                      |
| Stage XV.2    | Mouth encircled by anterior arms                                                |
|               | First chromatophores on posterior mantle appear                                 |
| Stage XVI     | Mouth completely covered by arm crown                                           |
|               | Yolk size 1/3rd of embryo + yolk                                                |
|               | Few chromatophores on anterior mantle evident                                   |
| Stage XVII    | Chromatophores darker and more numerous                                         |
| Stage XVIII.1 | Yolk size 1/4th of embryo + yolk                                                |
|               | Posterior chromatophores darker and chromatophores appear next to the eye       |
|               | Embryo more active in egg (mantle contraction)                                  |
| Stage XVIII.2 | Anterior chromatophores darker. Chromatophores react to light stimulus          |
| Stage XIX.1   | Eyes tilted and covered with iridophores                                        |
|               | Yolk size 1/6th of embryo + yolk                                                |
|               | Embryos react to mechanical stimulus                                            |
|               | Pigmentation of ink sac                                                         |
| Stage XIX.2   | Embryos completed second reversion                                              |
| Stage XX.1    | Minimal outer yolk sack                                                         |
|               | Chromatophore expansion and contraction more widely distributed                 |
| Stage XX.2    | Absence of outer yolk                                                           |
|               | Hatching                                                                        |

471

472 **Table 2. Comparative developmental guide for cephalopod development**

| <i>Octopus vulgaris</i>        | <i>Doryteuthis pealei</i> | <i>Sepia officinalis</i> | General characteristics                                  | Stage                   |
|--------------------------------|---------------------------|--------------------------|----------------------------------------------------------|-------------------------|
| <b>Adapted from Naef, 1928</b> | <b>Arnold, 1965</b>       | <b>Boletzky, 2016</b>    |                                                          |                         |
| Fertilized egg                 | Stage 1                   | Stage 1                  | Newly laid fertilized egg that did not finish maturation | Segmentation (cleavage) |
| First maturation division      | Stage 2                   | Stage 1                  | First polar body                                         | Segmentation (cleavage) |
| Second maturation division     | Stage 3                   | Stage 1                  | 3 polar bodies                                           | Segmentation (cleavage) |
| 2 cells, first cleavage        | Stage 4                   | Stage 2                  | Two partially separated cells                            | Segmentation (cleavage) |
| 4 cells, second cleavage       | Stage 5                   | Stage 3                  | Four partially separated cells                           | Segmentation (cleavage) |
| 8 cells, third                 | Stage 6                   | Stage 4                  | Eight incompletely separated                             | Segmentation            |

|                             |                |             |                                                                                    |                           |
|-----------------------------|----------------|-------------|------------------------------------------------------------------------------------|---------------------------|
| cleavage                    |                |             | cells                                                                              | (cleavage)                |
| 16 cells, fourth cleavage   | Stage 7        | Stage 5     | 2 completely closed blastomeres, 14 blastococones                                  | Segmentation (cleavage)   |
| 32 cells, fifth cleavage    | Stage 8        | Stage 6     | 12 blastomeres, 20 blastococones                                                   | Segmentation (cleavage)   |
| 64-66 cells, sixth cleavage | Stage 9        | Stage 7     | 36 blastomeres, 28 blastococones                                                   | Segmentation (cleavage)   |
| Stage I                     | Stage 10       | Stage 8     | Morula (advanced cleavage)                                                         | Segmentation (cleavage)   |
| Stage II                    | Stage 10       | Stage 9     | Blastula                                                                           | Segmentation (cleavage)   |
| Stage III                   | Stage 11       | Stage 10    | Onset of epiboly                                                                   | Gastrulation              |
| Stage IV                    | Stage 12       | Stage 11-12 | Formation of the germinal disk (yolk envelope & embryonic proper)                  | Gastrulation              |
| Stage V                     | Stage 13       | Stage 13    | Epiboly continues                                                                  | Gastrulation              |
| Stage VI                    | Stage 14-15-16 | Stage 14    | Mesoderm concentrations become more distinct (smooth surface)                      | Epiboly                   |
| Stage VII.1                 | Stage 17       | Stage 15    | Visible thickening of placodes starts                                              | Epiboly                   |
| Stage VII.2                 | Stage 18       | Stage 15    | Primordia of mantle, eyes, mouth and arms visible                                  | Epiboly/<br>Organogenesis |
| Stage VIII                  | Stage 19       | Stage 16    | Mouth and eye invagination, funnel pouches and statocysts visible                  | Organogenesis             |
| Stage IX                    | Stage 20       | Stage 17    | Primordia more prominent. Funnel tube rudiments are distinct                       | Organogenesis             |
| Stage X                     | Stage 21       | Stage 18    | Eye vesicles closed and sticking out. Funnel tube rudiments fuse ventrally         | Organogenesis             |
| Stage XI                    | Stage 22       | Stage 19    | Mantle starts to grow. Funnel tube rudiments bend towards midline                  | Organogenesis             |
| Stage XII.1                 | Stage 23       | Stage 20    | Funnel tube rudiments start to form a tube ventrally. Mantle covers 1/2nd of gills | Organogenesis             |
| Stage XII.2                 | Stage 23       | Stage 20    | Funnel formed siphon at ventral extremity. Mantle bowl-shaped                      | Organogenesis             |
| Stage XIII                  | Stage 23       | Stage 21    | Formation of the funnel complete. Iris fold rudiment visible                       | Organogenesis             |
| Stage XIV                   | Stage 24       | Stage 22    | Mantle as wide as long and covers gills completely                                 | Organogenesis             |
| Stage XV.1                  | Stage 25       | Stage 23    | Mantle covers ventral margin of funnel. Inner yolk strongly constricted            | Organogenesis             |
| Stage XV.2                  | Stage 26       | Stage 24    | Mouth starts to internalize                                                        | Organogenesis             |
| Stage XVI                   | Stage 27       | Stage 25-26 | Few anterior chromatophores evident. Mouth completely covered by arm crown         | Organogenesis             |
| Stage XVII                  | Stage 28       | Stage 27    | Mantle enlarged in relation to head. Chromatophores numerous                       | Organogenesis             |

|                       |          |          |                                                               |        |
|-----------------------|----------|----------|---------------------------------------------------------------|--------|
| Stage XVIII.1         | Stage 28 | Stage 27 | Yolk sac same size as head<br>( <i>Octopus &amp; Loligo</i> ) | Growth |
| Stage XVIII.2         | Stage 28 | Stage 27 | Chromatophores darker                                         | Growth |
| Stage XIX.1-<br>XIX.2 | Stage 29 | Stage 28 | Pigmentation of ink sac. Eyes<br>covered with iridophores     | Growth |
| Stage XX.1            | Stage 29 | Stage 29 | Yolk nearly depleted                                          | Growth |
| Stage XX.2            | Stage 30 | Stage 30 | Loss of outer yolk and hatchling                              | Growth |

473

## 474 [Supplementary movies](#)

### 475 [Additional file 1](#)

476 .mov

#### 477 **Movie of embryo rotation at Stage XI**

478 The embryo rotates around its longitudinal axis starting from Stage VI. This movie shows this

479 movement accelerated to 8x the original speed.

### 480 [Additional file 2](#)

481 .avi

#### 482 **Movie of a CUBIC cleared embryo stained with DAPI at Stage VIII**

483 A Stage VIII CUBIC cleared, DAPI stained embryo imaged with LSM shown rotating along the

484 longitudinal axis.

### 485 [Additional file 3](#)

486 .avi

#### 487 **Movie of a CUBIC cleared embryo stained with DAPI at Stage IX**

488 A Stage IX CUBIC cleared, DAPI stained embryo imaged with LSM shown rotating along the

489 longitudinal axis.

490 [Additional file 4](#)

491 .avi

492 **Movie of a CUBIC cleared embryo stained with DAPI at Stage X**

493 A Stage X CUBIC cleared, DAPI stained embryo imaged with LSFM shown rotating along the

494 longitudinal axis.

495 [Additional file 5](#)

496 .avi

497 **Movie of a CUBIC cleared embryo stained with DAPI at Stage XI**

498 A Stage XI CUBIC cleared, DAPI stained embryo imaged with LSFM shown rotating along the

499 longitudinal axis.

500 [Additional file 6](#)

501 .avi

502 **Movie of a CUBIC cleared embryo stained with DAPI at Stage XII.1**

503 A Stage XII.1 CUBIC cleared, DAPI stained embryo imaged with LSFM shown rotating along the

504 longitudinal axis.

505 [Additional file 7](#)

506 .avi

507 **Movie of a CUBIC cleared embryo stained with DAPI at Stage XII.2**

508 A Stage XII.2 CUBIC cleared, DAPI stained embryo imaged with LSFM shown rotating along the

509 longitudinal axis.

510 [Additional file 8](#)

511 .avi



512 **Movie of a CUBIC cleared embryo stained with DAPI at Stage XIII**

513 A Stage XIII CUBIC cleared, DAPI stained embryo imaged with LSFM shown rotating along the  
514 longitudinal axis.

515 [Additional file 9](#)

516 .avi

517 **Movie of a CUBIC cleared embryo stained with DAPI at Stage XIV**

518 A Stage XIV CUBIC cleared, DAPI stained embryo imaged with LSFM shown rotating along the  
519 longitudinal axis.

520 [Additional file 10](#)

521 .avi

522 **Movie of a CUBIC cleared embryo stained with DAPI at Stage XV.1**

523 A Stage XV.1 CUBIC cleared, DAPI stained embryo imaged with LSFM shown rotating along the  
524 longitudinal axis.

525 [Additional file 11](#)

526 .avi

527 **Movie of a CUBIC cleared embryo stained with DAPI at Stage XV.2**

528 A Stage XV.2 CUBIC cleared, DAPI stained embryo imaged with LSFM shown rotating along the  
529 longitudinal axis.

530 [Additional file 12](#)

531 .avi

532 **Movie of a CUBIC cleared embryo stained with DAPI at Stage XVI**

533 A Stage XVI CUBIC cleared, DAPI stained embryo imaged with LSFM shown rotating along the  
534 longitudinal axis.

535 [Additional file 13](#)

536 .avi

537 **Movie of a CUBIC cleared embryo stained with DAPI at Stage XVII**

538 A Stage XVII CUBIC cleared, DAPI stained embryo imaged with LSFM shown rotating along the  
539 longitudinal axis.

540 [Additional file 14](#)

541 .mov

542 **Movie of external yolk contraction at Stage XI**

543 The yolk sack of the embryo contracts between Stages IX and XVI and is shown here at Stage XI.

544 [Additional file 15](#)

545 .avi

546 **Movie of heart beat at Stage XVII**

547 Heart beat can be observed from Stage XIV onwards and is shown here at Stage XVII.

548 [Additional file 16](#)

549 .avi

550 **Movie of a CUBIC cleared embryo stained with DAPI at Stage XX.2**

551 A Stage XX.2 CUBIC cleared, DAPI stained embryo imaged with LSFM shown rotating along the  
552 longitudinal axis.

553

## 554 References

- 555 1. Amor MD, Norman MD, Roura A, Leite TS, Gleadall IG, Reid A, et al. Morphological  
556 assessment of the *Octopus vulgaris* species complex evaluated in light of molecular-based  
557 phylogenetic inferences. *Zool Scr.* 2017;46(3):275–88.
- 558 2. Naef A. Cephalopoda embryology. Fauna and flora of the Bay of Naples. Part I, Vol. II.  
559 (Translated from German). 1928. 1–357 p.
- 560 3. Boletzky S von. Encapsulation of Cephalopod Embryos: a Search for Functional Correlations.  
561 *Am Malacol Bull.* 1986;4(2):217–27.
- 562 4. Norman M. Cephalopods: A world guide. Coch books, Hackenheim, Ger. 2000;
- 563 5. Boletzky S von. Biology of early life stages in cephalopod molluscs. *Adv Mar Biol.*  
564 2003;44(August):143–203.
- 565 6. Mangold K. *Octopus vulgaris*. In: Cephalopod Life Cycles Volume I Species Accounts. 1983. p.  
566 335–64.
- 567 7. Wells MJ, Wells J. Cephalopoda: Octopoda. In: Reproduction of marine invertebrates Vol IV  
568 Molluscs: gastropods and cephalopods. 1977. p. 291–336.
- 569 8. Márquez L, Quintana D, Lorenzo A, Almansa E. Biometrical relationships in developing eggs  
570 and neonates of *Octopus vulgaris* in relation to parental diet. *Helgol Mar Res.*  
571 2013;67(3):461–70.
- 572 9. Villanueva R, Norman MD. Biology of The Planktonic Stages of Benthic Octopuses. *Oceanogr*  
573 *Mar Biol An Annu Rev.* 2008;46:105–202.
- 574 10. Vidal EAG, Zeidberg LD, Buskey EJ. Development of swimming abilities in squid paralarvae:  
575 Behavioral and ecological implications for dispersal. *Front Physiol.* 2018;9(JUL).
- 576 11. Vidal EAG, Salvador B. The Tentacular Strike Behavior in Squid: Functional Interdependency of

- 577 Morphology and Predatory Behaviors During Ontogeny. *Front Physiol* [Internet].  
578 2019;10(December):1–15. Available from:  
579 <https://www.frontiersin.org/article/10.3389/fphys.2019.01558/full>
- 580 12. Boletzky S von. Rotation and First Reversion in the *Octopus* Embryo - A Case of Gradual  
581 Reversal of Ciliary Beat. *Experientia*. 1971;27(5):558–60.
- 582 13. Portmann A. Die Lageveränderungen der Embryonen von *Eledone* und *Tremoctopus*. *Rev*  
583 *Suisse Zool*. 1937;44:359–61.
- 584 14. Orelli M v., Mangold KM. La Blastocinèse de l'embryon d'*Octopus vulgaris*. *Vie Milieu*.  
585 1961;12:77–88.
- 586 15. Vidal EAG, Villanueva R, Andrade JP, Gleadall IG, Iglesias J, Koueta N, et al. Cephalopod  
587 culture: Current status of main biological models and research priorities. *Adv Mar Biol*.  
588 2014;67:1–98.
- 589 16. Wintrebert P. L'éclosion par digestion de la coque chez les poissons, les amphibiens et les  
590 céphalopodes dibranchiaux décapodes. *CR Assoc Anat*. 1928;501–3.
- 591 17. Orelli M v. Follikelfalten und Dotterstrukturen der Cephalopoden-Eier. *Verhandlungen der*  
592 *Naturforschenden Gesellschaft Basel*. 1960;71:272–82.
- 593 18. Denucé JM, Formisano A. Circumstantial evidence for an active contribution of Hoyle's gland  
594 to enzymatic hatching of Cephalopod embryos. *Arch Int Physiol Biochim*. 1982;90(4):B185 6.
- 595 19. Cyran N, Palumbo A, Klepal W, Vidal EAG, Staedler Y, Schönenberger J, et al. The short life of  
596 the Hoyle organ of *Sepia officinalis*: formation, differentiation and degradation by  
597 programmed cell death. *Hydrobiologia*. 2018;808(1):35–55.
- 598 20. Boletzky S von. Hatch-as-hatch-can: Tricks of the trade in coleoid hatchlings (Mollusca:  
599 Cephalopoda). *Neues Jahrb fur Geol und Palaontologie - Abhandlungen*. 2012;266(1):67–76.

- 600 21. Boletzky S von. Cephalopod eggs and egg masses. *Oceanogr Mar Biol An Annu Rev.*  
601 1998;36:341–71.
- 602 22. Albertin CB, Simakov O, Mitros T, Wang ZY, Pungor JR, Edsinger-Gonzales E, et al. The octopus  
603 genome and the evolution of cephalopod neural and morphological novelties. *Nature.*  
604 2015;524(7564):220–4.
- 605 23. Belcaid M, Casaburi G, McAnulty SJ, Schmidbaur H, Suria AM, Moriano-Gutierrez S, et al.  
606 Symbiotic organs shaped by distinct modes of genome evolution in cephalopods. *Proc Natl*  
607 *Acad Sci U S A.* 2019;116(8):3030–5.
- 608 24. Kim B-M, Kang S, Ahn D-H, Jung S-H, Rhee H, Yoo JS, et al. The genome of common long-arm  
609 octopus *Octopus minor*. *Gigascience.* 2018;7.
- 610 25. Zarrella I, Herten K, Maes G, Tai S, Yang M, Seuntjens E, et al. The survey and reference  
611 assisted assembly of the *Octopus vulgaris* genome. *Sci Data.* 2019;6(13).
- 612 26. García-Fernández P, Prado-Alvarez M, Nande M, Garcia de la serrana D, Perales-Raya C,  
613 Almansa E, et al. Global impact of diet and temperature over aquaculture of *Octopus vulgaris*  
614 paralarvae from a transcriptomic approach. *Sci Rep [Internet].* 2019;9(1):10312. Available  
615 from: <http://www.nature.com/articles/s41598-019-46492-2>
- 616 27. Arnold JM. Normal embryonic stages of the squid, *Loligo pealii* (Lesuer). *Biology (Basel).*  
617 1965;128:24–32.
- 618 28. Boletzky S von, Andouche A, Bonnaud-Ponticelli L. A developmental table of embryogenesis  
619 in *Sepia officinalis*. *Vie Milieu - Life Environ.* 2016;66(1):11–23.
- 620 29. Guerra A, Rocha F, González AF, Bückle LF. Embryonic stages of the Patagonian squid *Loligo*  
621 *gahi* (mollusca: Cephalopoda). *Veliger.* 2001;44(2):109–15.
- 622 30. Watanabe K, Segawa S, Sakurai Y, Okutani T. Development of the ommastrephid squid

- 623            *Todarodes pacificus*, from fertilized egg to rhynchoteuthion paralarva. Am Malacol Bull.  
624            1996;13(1-2):73-88.
- 625    31.    Lee PN, Callaerts P, de Couet HG. The embryonic development of the hawaiian bobtail squid  
626            (*Euprymna scolopes*). Cold Spring Harb Protoc. 2009;4(11).
- 627    32.    Lemaire J. Table de développement embryonnaire de *Sepia officinalis* L. (Mollusque  
628            Céphalopode). Bull la Société Zool Fr. 1970;95:773-82.
- 629    33.    Uriarte I, Iglesias J, Domingues P, Rosas C, Viana MT, Navarro JC, et al. Current Status and  
630            Bottle Neck of Octopod Aquaculture: The Case of American Species. J World Aquac Soc.  
631            2011;42(6):735-52.
- 632    34.    Boletzky S von, Villanueva R. Cephalopod Biology. In: Cephalopod Culture. 2014. p. 1-494.
- 633    35.    Marthy H-J. Natural tranquilliser in cephalopod eggs. Nature. 1976;261:496-7.
- 634    36.    Villanueva R. Experimental rearing and growth of planktonic *Octopus vulgaris* from hatching  
635            to settlement. Can J Fish Aquat. 1995;52:2639-50.
- 636    37.    Nixon M, Mangold K. The early life of *Sepia officinalis*, and the contrast with that of *Octopus*  
637            *vulgaris* (Cephalopoda). J Zool. 1998;245:407-21.
- 638    38.    Seibel BA, Robison BH, Haddock SHD. Post-spawning egg care by a squid. Nature.  
639            2005;438(7070):929.
- 640    39.    Sykes A V, Perkins K, Grigoriou P, Almansa E. Aquarium Maintenance Related Diseases. In:  
641            Gestal C, Pascual S, Guerra Á, Fiorito G, Vieites JM, editors. Handbook of Pathogens and  
642            Diseases in Cephalopods [Internet]. Cham: Springer International Publishing; 2019. p. 181-91.  
643            Available from: [https://doi.org/10.1007/978-3-030-11330-8\\_13](https://doi.org/10.1007/978-3-030-11330-8_13)
- 644    40.    Rosas C, Gallardo P, Mascaró M, Caamal-Monsreal C, Pascual C. *Octopus maya*. In:  
645            Cephalopod Culture. 2014. p. 383-96.

- 646 41. Van Heukelem WF. Laboratory maintenance, breeding, rearing, and biomedical research  
647 potential of the Yucatan octopus (*Octopus maya*). Lab Anim Sci [Internet]. 1977;27(5 Pt  
648 2):852—859. Available from: <http://europepmc.org/abstract/MED/592733>
- 649 42. Sen H. A preliminary study on the effects of salinity on egg development of European squid  
650 (*Loligo vulgaris lamarck*, 1798). Turkish J Fish Aquat Sci. 2004;4:95–101.
- 651 43. Maldonado E, Rangel-huerta E, Gonza R, Fajardo-alvarado G, Morillo-Velarde PS. *Octopus*  
652 *insularis* as a new marine model for evolutionary developmental biology. Biol Open.  
653 2019;8(11).
- 654 44. Vidal EAG, Boletzky S Von. *Loligo vulgaris* and *Doryteuthis opalescens*. In: Iglesias J, Fuentes L,  
655 Villanueva R, editors. Cephalopod Culture [Internet]. Dordrecht: Springer Netherlands; 2014.  
656 p. 271–313. Available from: [https://doi.org/10.1007/978-94-017-8648-5\\_16](https://doi.org/10.1007/978-94-017-8648-5_16)
- 657 45. Susaki EA, Tainaka K, Perrin D, Yukinaga H, Kuno A, Ueda HR. Advanced CUBIC protocols for  
658 whole-brain and whole-body clearing and imaging. Nat Protoc [Internet]. 2015;10(11):1709–  
659 27. Available from: <http://dx.doi.org/10.1038/nprot.2015.085>
- 660

**A**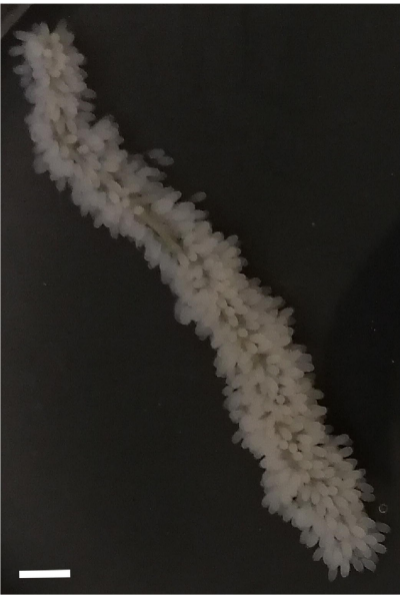**B**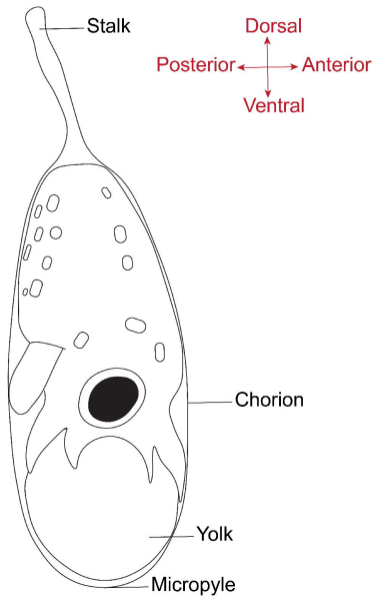



A

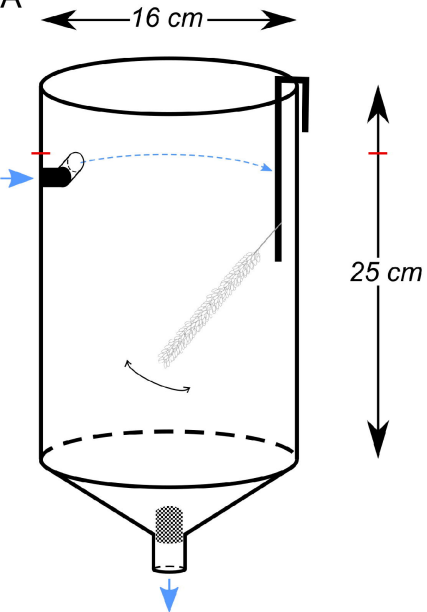

B

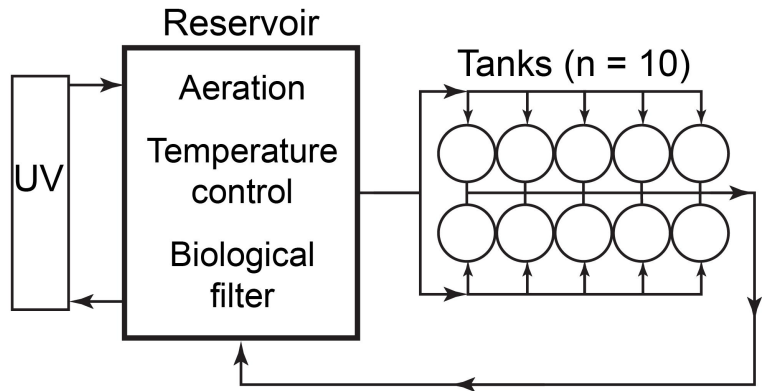

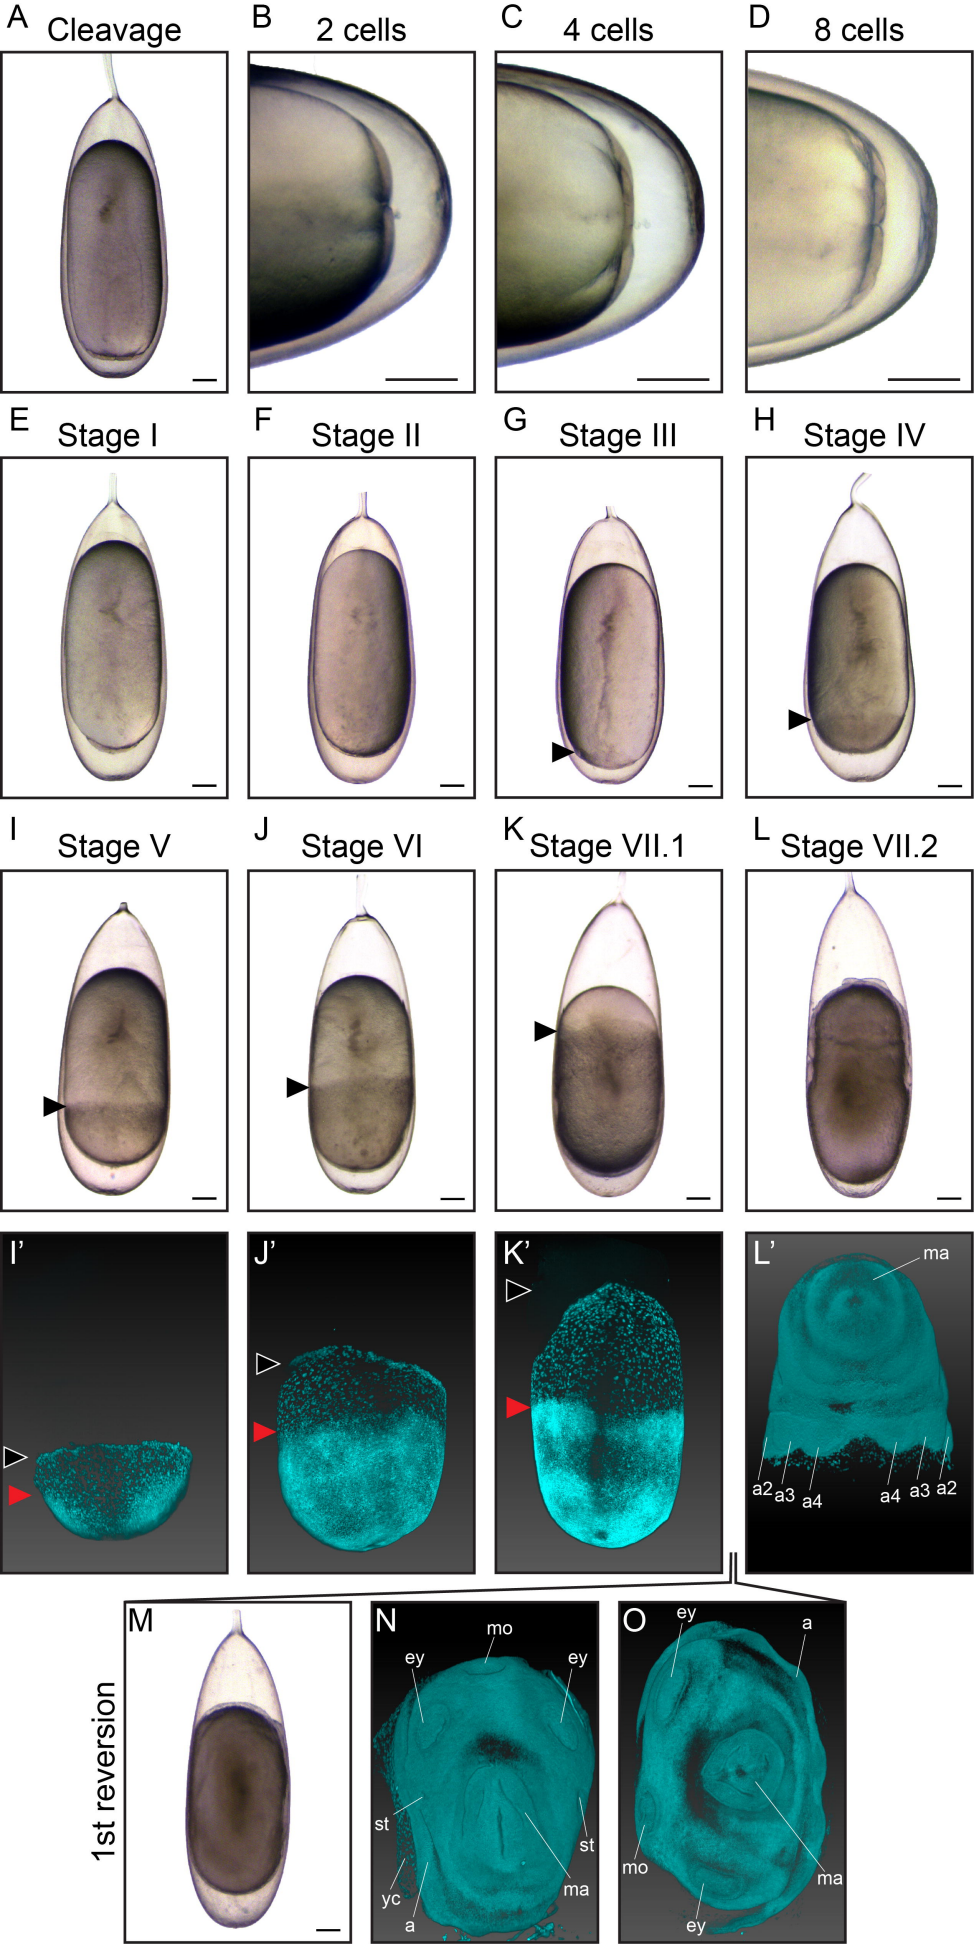

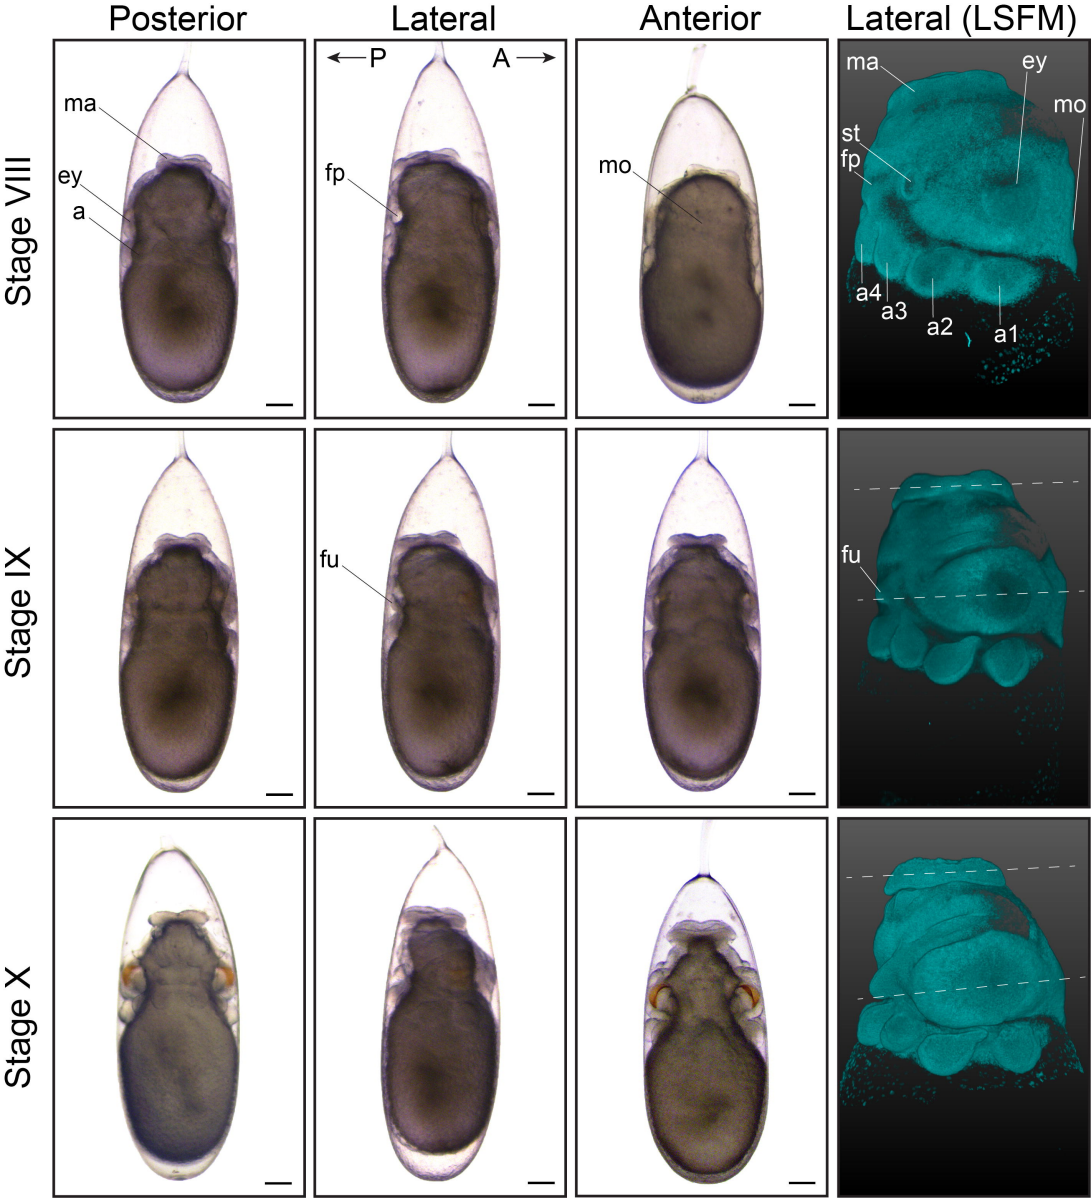

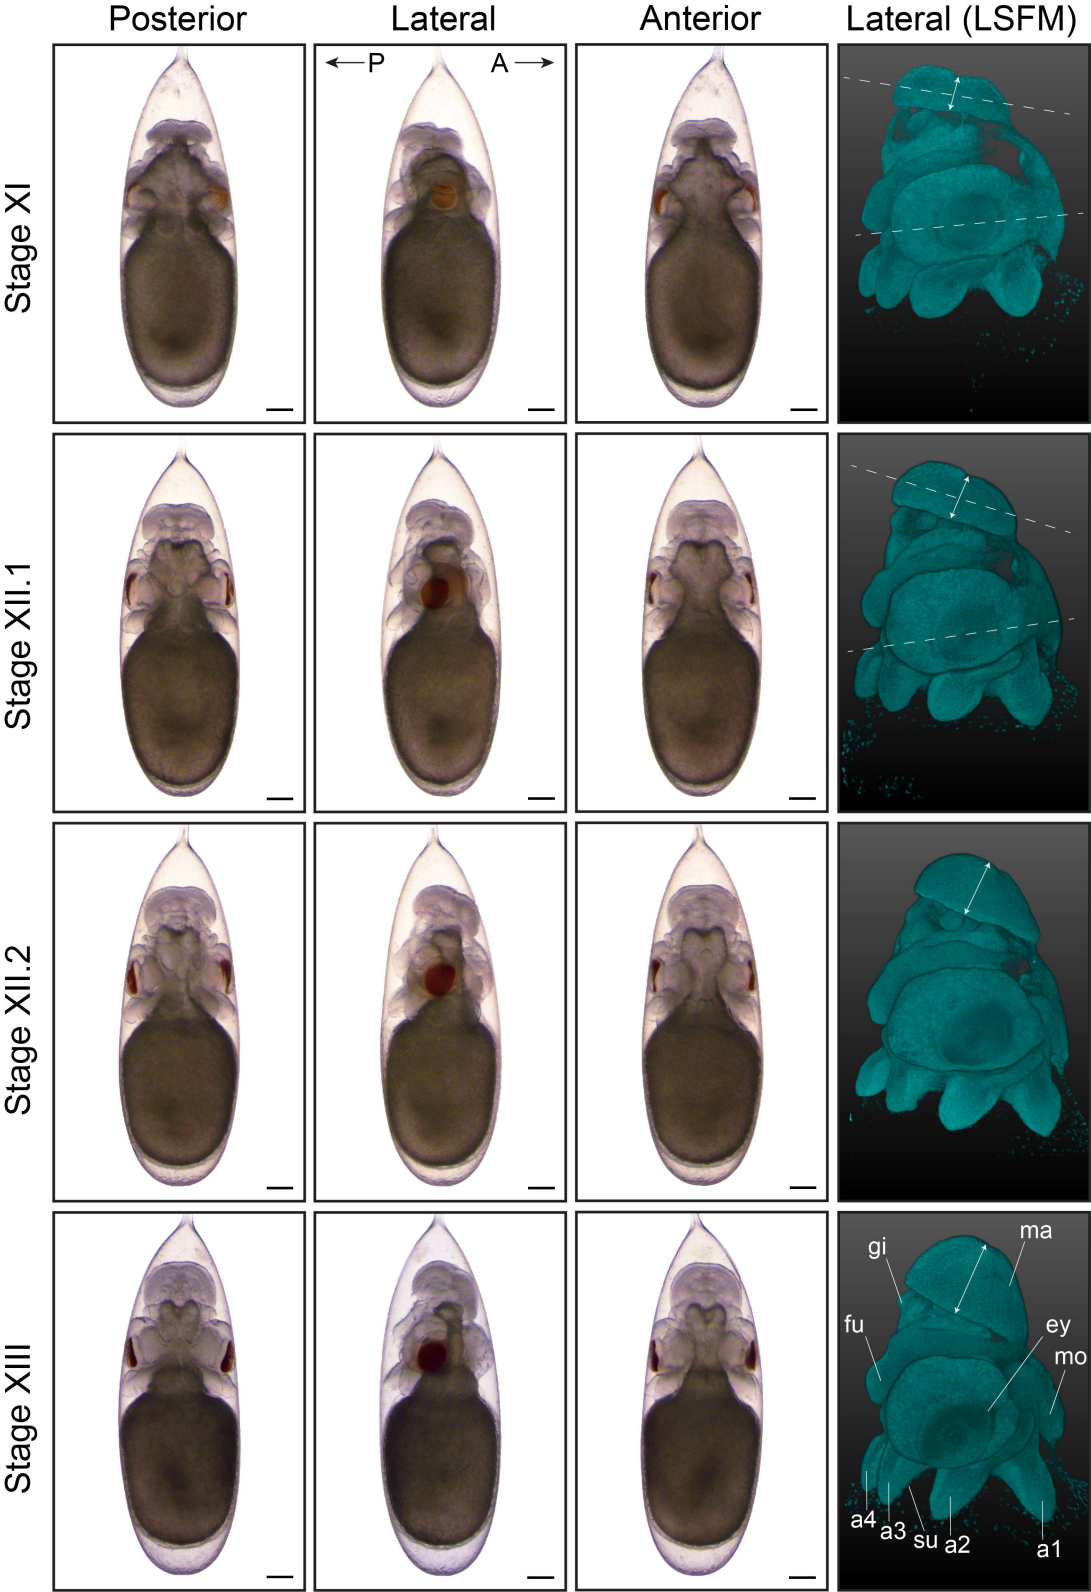



# Funnel (Posterior)

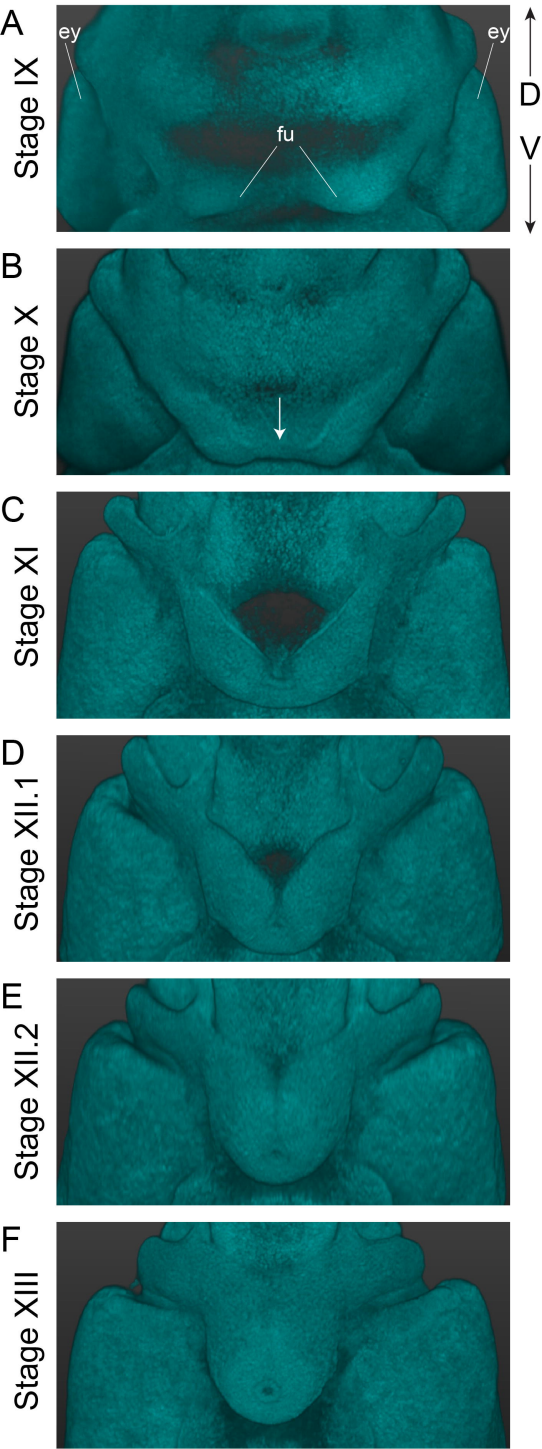

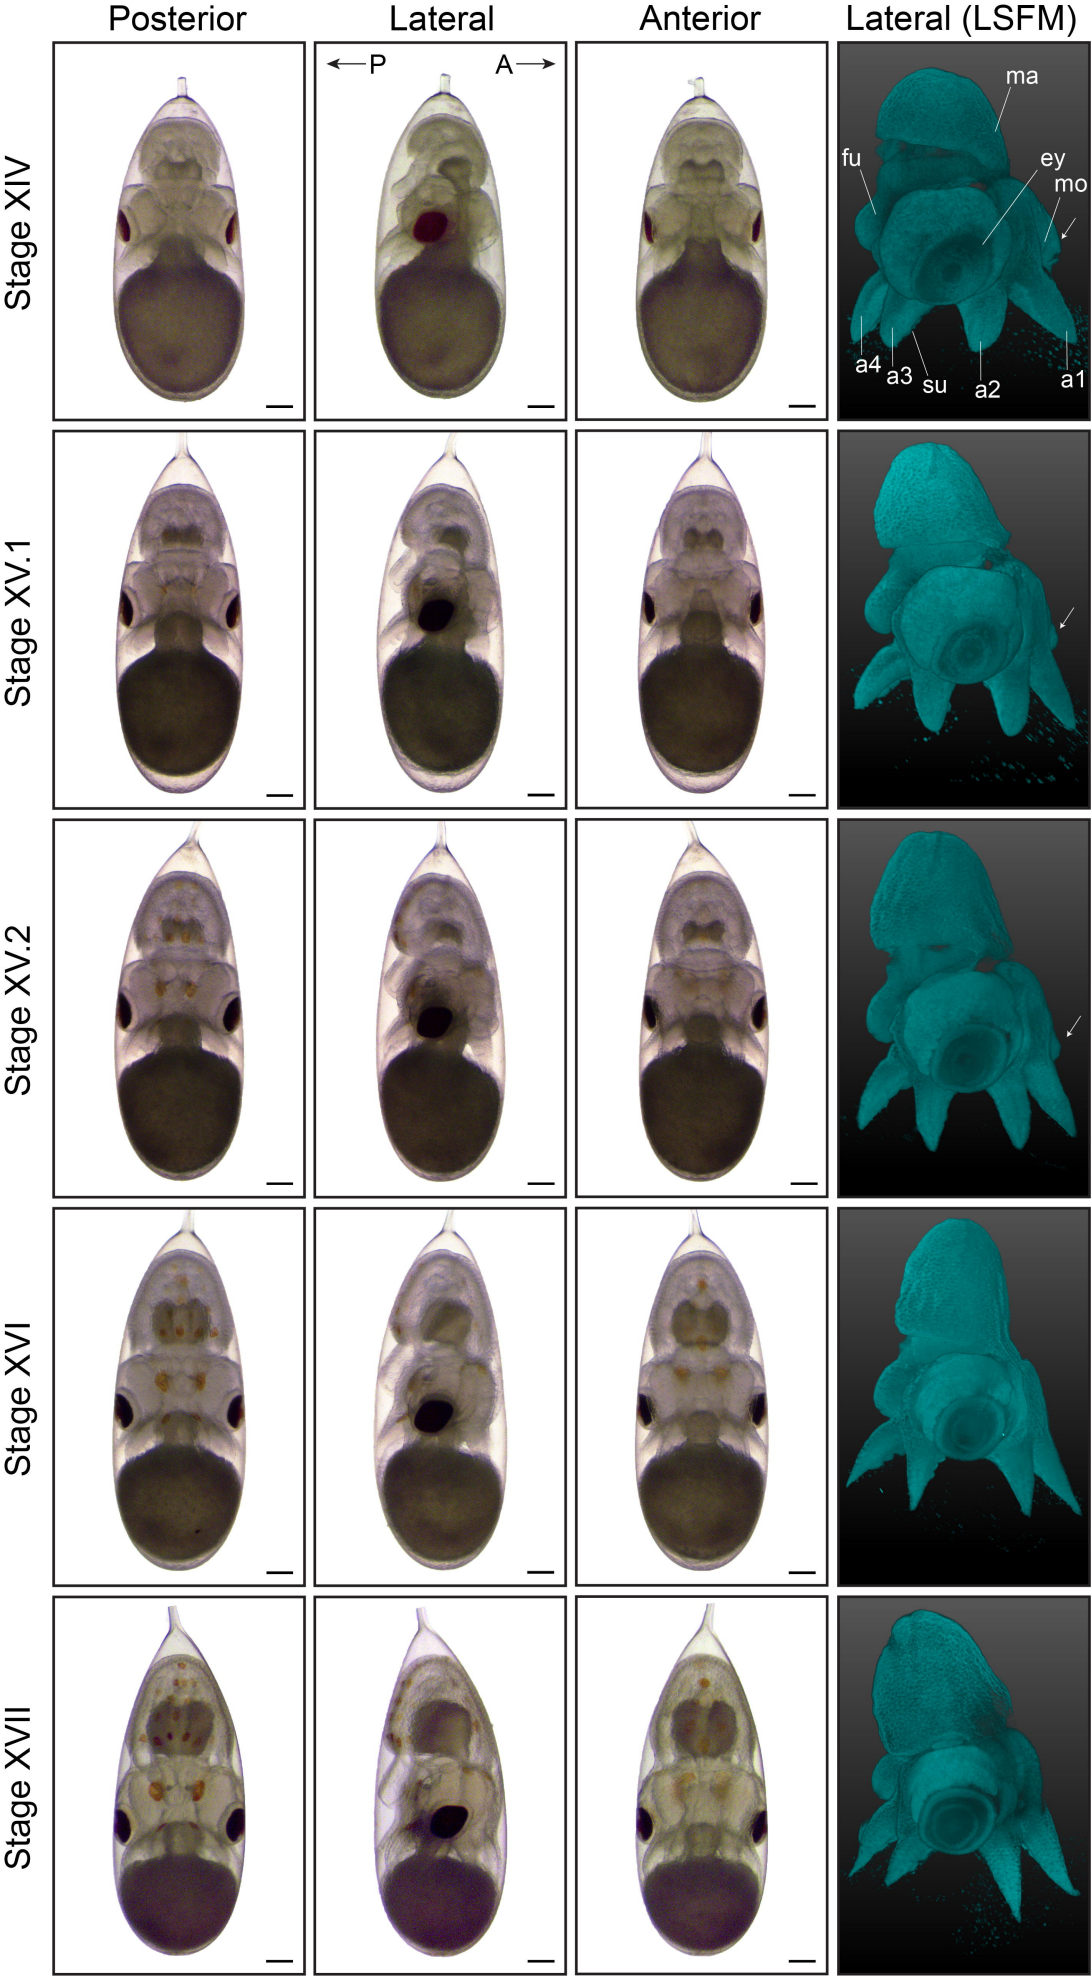

Posterior

Lateral

Anterior

Stage XVIII.1

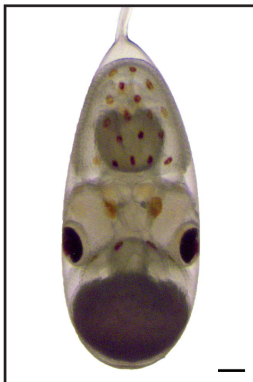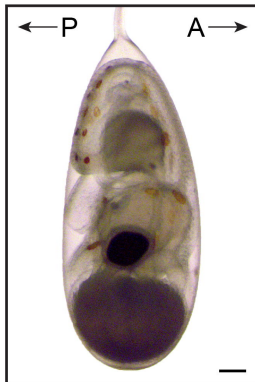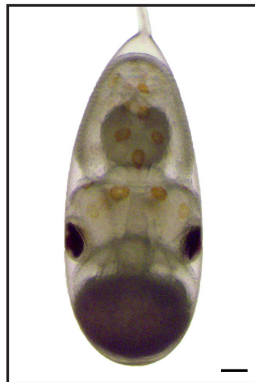

Stage XVIII.2

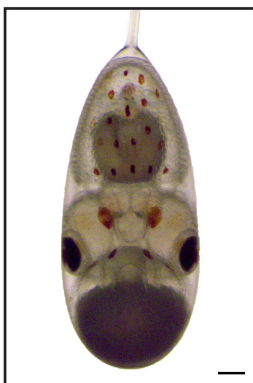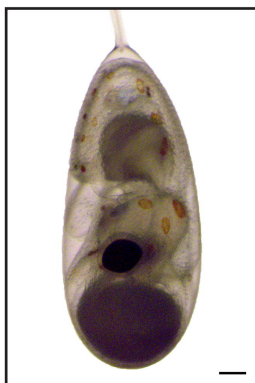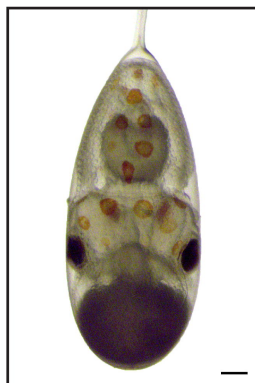

Stage XIX.1

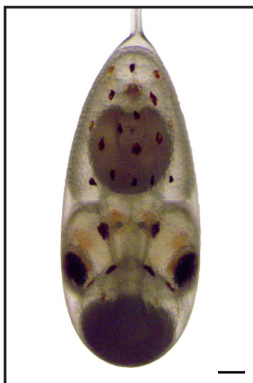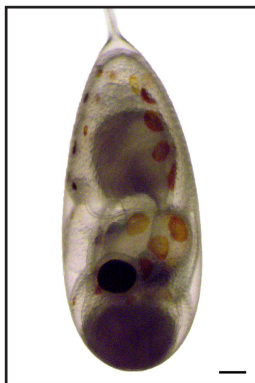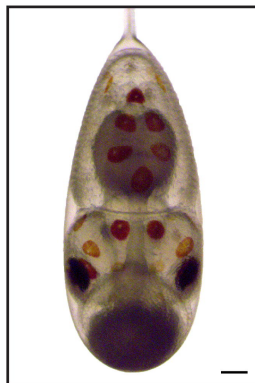

Posterior

Lateral

Anterior

Stage XIX.2

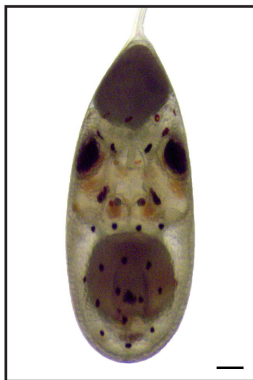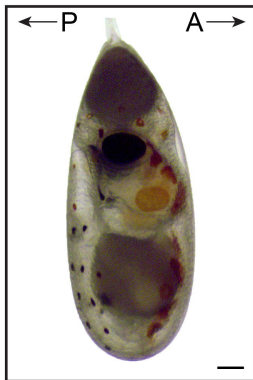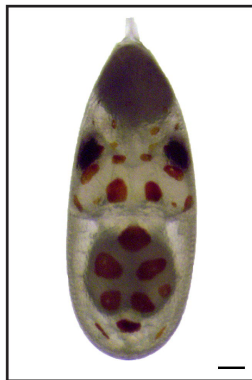

Stage XX.1

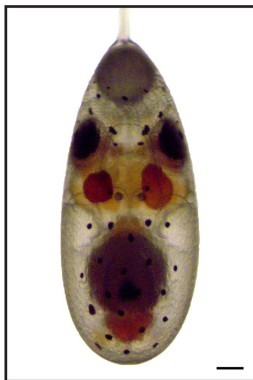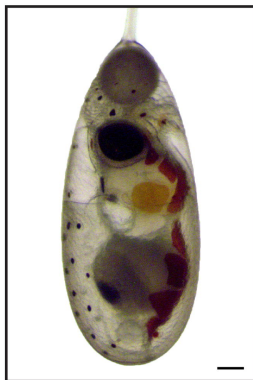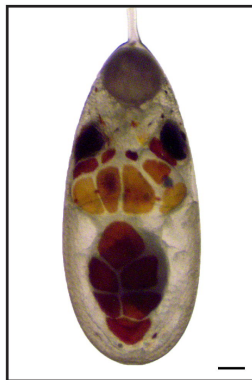

Stage XX.2

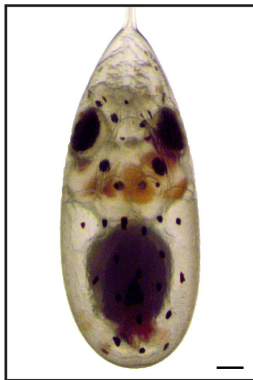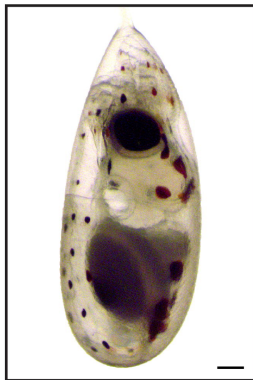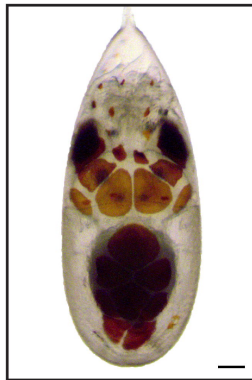

Source: http://biorxiv.org/content/10.1101/2020.01.13.903922v1.full.pdf
